# Supplementary material for: Extended Knee Control programme lowers weekly hamstring, knee and ankle injury prevalence compared with an adductor strength programme or self-selected injury prevention exercises in adolescent and adult amateur football players: a two-armed cluster-randomised trial with an additional comparison arm
Source: PubMed Central journal article supplement (PMC9872240; doi:10.1136/bjsports-2022-105890), 2022-10-31
Supplement: bjsports-2022-105890supp002.pdf [file bjsports-2022-105890supp002.pdf]

**Supplementary Table 1: Training and match exposure, preventive programme use and descriptive data on injury events**

|                                                         | Extended <i>Knee Control</i> |               |               | Adductor programme |               |               | Comparison group |               |               |
|---------------------------------------------------------|------------------------------|---------------|---------------|--------------------|---------------|---------------|------------------|---------------|---------------|
|                                                         | All players                  | Male          | Female        | All players        | Male          | Female        | All players      | Male          | Female        |
| <b>Exposure and preventive programme use</b>            | <b>n=197</b>                 | <b>n=71</b>   | <b>n=126</b>  | <b>n=125</b>       | <b>n=22</b>   | <b>n=103</b>  | <b>n=180</b>     | <b>n=62</b>   | <b>n=118</b>  |
| Training exposure h per player and week, mean $\pm$ SD  | 3.0 $\pm$ 2.0                | 3.4 $\pm$ 2.3 | 2.8 $\pm$ 1.9 | 2.5 $\pm$ 1.8      | 2.1 $\pm$ 1.9 | 2.6 $\pm$ 1.8 | 2.6 $\pm$ 2.0    | 2.9 $\pm$ 2.2 | 2.5 $\pm$ 1.9 |
| Match exposure h per player and week, mean $\pm$ SD     | 0.6 $\pm$ 0.9                | 0.5 $\pm$ 0.8 | 0.7 $\pm$ 0.9 | 0.6 $\pm$ 0.8      | 0.5 $\pm$ 0.9 | 0.6 $\pm$ 0.8 | 0.6 $\pm$ 0.8    | 0.6 $\pm$ 0.8 | 0.6 $\pm$ 0.8 |
| Total exposure h per player and week, mean $\pm$ SD     | 3.6 $\pm$ 2.3                | 4.0 $\pm$ 2.6 | 3.5 $\pm$ 2.2 | 3.1 $\pm$ 2.2      | 2.6 $\pm$ 2.2 | 3.1 $\pm$ 2.2 | 3.2 $\pm$ 2.3    | 3.5 $\pm$ 2.6 | 3.1 $\pm$ 2.2 |
| Preventive programme use, times per week, mean $\pm$ SD | 1.6 $\pm$ 1.2                | 1.8 $\pm$ 1.4 | 1.5 $\pm$ 1.1 | 1.0 $\pm$ 0.9      | 0.9 $\pm$ 1.0 | 1.0 $\pm$ 0.9 | 1.4 $\pm$ 1.2    | 1.3 $\pm$ 1.2 | 1.5 $\pm$ 1.2 |
| Training exposure season, sum h                         | 8211                         | 2548          | 5664          | 4003               | 441           | 3563          | 5874             | 1601          | 4274          |
| Match exposure season, sum h                            | 1759                         | 374           | 1385          | 910                | 109           | 801           | 1291             | 317           | 974           |
| Total exposure season, sum h                            | 9971                         | 2922          | 7049          | 4913               | 550           | 4363          | 7165             | 1918          | 5248          |
| <b>Injury events (n=458)</b>                            | <b>n=171</b>                 | <b>n=51</b>   | <b>n=120</b>  | <b>n=114</b>       | <b>n=14</b>   | <b>n=100</b>  | <b>n=173</b>     | <b>n=38</b>   | <b>n=135</b>  |
| <b>Primary outcomes</b>                                 |                              |               |               |                    |               |               |                  |               |               |
| Injury to 3 lower-limb locations combined n (%)*        | 77 (45.0)                    | 25 (49.0)     | 52 (43.3)     | 46 (40.4)          | 6 (42.9)      | 40 (40.0)     | 78 (45.1)        | 10 (26.3)     | 68 (50.4)     |
| Groin injury n (%)                                      | 20 (11.7)                    | 12 (23.5)     | 8 (6.7)       | 14 (12.3)          | 1 (7.1)       | 13 (13.0)     | 17 (9.8)         | 5 (13.2)      | 12 (8.9)      |
| <b>Secondary outcomes</b>                               |                              |               |               |                    |               |               |                  |               |               |
| All physical complaints n (%)                           | 171 (100)                    | 51 (100)      | 120 (100)     | 114 (100)          | 14 (100)      | 100 (100)     | 173 (100)        | 38 (100)      | 135 (100)     |
| New injury n (%)†                                       | 83 (49.7)                    | 21 (42.9)     | 62 (52.5)     | 60 (52.6)          | 8 (57.1)      | 52 (52.0)     | 72 (41.6)        | 15 (39.5)     | 57 (42.2)     |
| Re-injury same season n (%)†                            | 29 (17.4)                    | 5 (10.2)      | 24 (20.3)     | 21 (18.4)          | 1 (7.1)       | 20 (20.0)     | 34 (19.7)        | 10 (26.3)     | 24 (17.8)     |
| Re-injury previous season n (%)†                        | 55 (32.9)                    | 23 (46.9)     | 32 (27.1)     | 33 (28.9)          | 5 (35.7)      | 28 (28.0)     | 67 (38.7)        | 13 (34.2)     | 54 (40.0)     |
| Time-loss n (%)                                         | 81 (47.4)                    | 26 (51.0)     | 55 (45.8)     | 67 (58.9)          | 9 (62.3)      | 58 (58.0)     | 113 (65.3)       | 26 (68.4)     | 87 (64.4)     |
| Medical attention n (%)‡                                | 44 (25.9)                    | 20 (40.0)     | 24 (20.0)     | 29 (25.4)          | 1 (7.1)       | 28 (28.0)     | 40 (23.3)        | 7 (18.9)      | 33 (24.4)     |
| Sudden-onset n (%)¶                                     | 77 (46.1)                    | 23 (46.0)     | 54 (46.2)     | 58 (52.3)          | 11 (78.6)     | 47 (48.5)     | 83 (50.0)        | 19 (54.3)     | 64 (48.9)     |
| Gradual-onset n (%)¶                                    | 90 (53.9)                    | 27 (54.0)     | 63 (53.8)     | 53 (47.7)          | 3 (21.4)      | 50 (51.5)     | 83 (50.0)        | 16 (45.7)     | 67 (51.1)     |

Injury data is presented with contusions excluded. Time-loss was defined based on response to the Oslo Sports Trauma Research Center questionnaire (question 1, equal to reduced participation or inability to participate). \*Injuries to any of the following locations: hamstring, knee or ankle. Missing data: †4 players extended *Knee Control*, ‡1 player extended *Knee Control*, 1 comparison group, ¶4 players extended *Knee Control*, 3 adductor, 7 comparison group

Abbreviations: h – hours; min – minutes; SD – standard deviation; wk – week
