# Supplementary material for: Extended Knee Control programme lowers weekly hamstring, knee and ankle injury prevalence compared with an adductor strength programme or self-selected injury prevention exercises in adolescent and adult amateur football players: a two-armed cluster-randomised trial with an additional comparison arm
Source: PubMed Central journal article supplement (PMC9872240; doi:10.1136/bjsports-2022-105890), 2022-10-31
Supplement: bjsports-2022-105890supp003.pdf [file bjsports-2022-105890supp003.pdf]

Supplementary Table 2 - Injury locations

|                                 | Extended <i>Knee Control</i> |                  |                   | Adductor programme |                  |                  | Comparison group  |                  |                   |
|---------------------------------|------------------------------|------------------|-------------------|--------------------|------------------|------------------|-------------------|------------------|-------------------|
|                                 | All n (%)                    | Male n (%)       | Female n (%)      | All n (%)          | Male n (%)       | Female n (%)     | All n (%)         | Male n (%)       | Female n (%)      |
| <b>Injury locations (n=514)</b> | <b>n=197</b>                 | <b>n=56</b>      | <b>n=141</b>      | <b>n=125</b>       | <b>n=14</b>      | <b>n=111</b>     | <b>n=192</b>      | <b>n=40</b>      | <b>n=152</b>      |
| <b>Head and neck</b>            | <b>6 (3.0)</b>               | <b>1 (1.8)</b>   | <b>5 (3.5)</b>    | <b>4 (3.2)</b>     | <b>0 (0.0)</b>   | <b>4 (3.6)</b>   | <b>5 (2.6)</b>    | <b>1 (2.5)</b>   | <b>4 (2.6)</b>    |
| Head                            | 3 (1.5)                      | 0 (0.0)          | 3 (2.1)           | 3 (2.4)            | 0 (0.0)          | 3 (2.7)          | 2 (1.0)           | 0 (0.0)          | 2 (1.3)           |
| Neck                            | 3 (1.5)                      | 1 (1.8)          | 2 (1.4)           | 1 (0.8)            | 0 (0.0)          | 1 (0.9)          | 3 (1.6)           | 1 (2.5)          | 2 (1.3)           |
| <b>Upper limb*</b>              | <b>5 (2.5)</b>               | <b>1 (1.8)</b>   | <b>4 (2.8)</b>    | <b>6 (4.8)</b>     | <b>1 (7.1)</b>   | <b>5 (4.5)</b>   | <b>7 (3.6)</b>    | <b>2 (5.0)</b>   | <b>5 (3.3)</b>    |
| Shoulder                        | 2 (1.0)                      | 0 (0.0)          | 2 (1.4)           | 3 (2.4)            | 0 (0.0)          | 3 (2.7)          | 3 (1.6)           | 1 (2.5)          | 2 (1.3)           |
| Wrist                           | 1 (0.5)                      | 0 (0.0)          | 1 (0.7)           | 0 (0.0)            | 0 (0.0)          | 0 (0.0)          | 1 (0.5)           | 0 (0.0)          | 1 (0.7)           |
| Hand                            | 2 (1.0)                      | 1 (1.8)          | 1 (0.7)           | 3 (2.4)            | 1 (7.1)          | 2 (1.8)          | 3 (1.6)           | 1 (2.5)          | 2 (1.3)           |
| <b>Trunk*</b>                   | <b>11 (5.6)</b>              | <b>2 (3.6)</b>   | <b>9 (6.4)</b>    | <b>7 (5.6)</b>     | <b>0 (0.0)</b>   | <b>7 (6.3)</b>   | <b>12 (6.3)</b>   | <b>5 (12.5)</b>  | <b>7 (4.6)</b>    |
| Chest                           | 1 (0.5)                      | 0 (0.0)          | 1 (0.7)           | 0 (0.0)            | 0 (0.0)          | 0 (0.0)          | 1 (0.5)           | 1 (2.5)          | 0 (0.0)           |
| Thoracic spine                  | 4 (2.0)                      | 0 (0.0)          | 4 (2.8)           | 1 (0.8)            | 0 (0.0)          | 1 (0.9)          | 1 (0.5)           | 1 (2.5)          | 0 (0.0)           |
| Lumbosacral                     | 6 (3.0)                      | 2 (3.6)          | 4 (2.8)           | 6 (4.8)            | 0 (0.0)          | 6 (5.4)          | 10 (5.2)          | 3 (7.5)          | 7 (4.6)           |
| <b>Lower limb</b>               | <b>175 (88.8)</b>            | <b>52 (92.9)</b> | <b>123 (87.2)</b> | <b>101 (80.8)</b>  | <b>13 (92.9)</b> | <b>88 (79.3)</b> | <b>164 (85.4)</b> | <b>30 (75.0)</b> | <b>134 (88.2)</b> |
| Groin                           | 20 (10.2)                    | 12 (21.4)        | 8 (5.7)           | 14 (11.2)          | 1 (7.1)          | 13 (11.7)        | 17 (8.9)          | 5 (12.5)         | 12 (7.9)          |
| Posterior thigh                 | 16 (8.1)                     | 7 (12.5)         | 9 (6.4)           | 5 (4.0)            | 0 (0.0)          | 5 (4.5)          | 19 (9.9)          | 5 (12.5)         | 14 (9.2)          |
| Anterior thigh                  | 13 (6.6)                     | 3 (5.4)          | 10 (7.1)          | 6 (4.8)            | 1 (7.1)          | 5 (4.5)          | 18 (9.4)          | 5 (12.5)         | 13 (8.6)          |
| Knee                            | 47 (23.9)                    | 13 (23.2)        | 34 (24.1)         | 19 (15.2)          | 2 (14.3)         | 17 (15.3)        | 41 (21.4)         | 4 (10.0)         | 37 (24.3)         |
| Lower leg                       | 32 (16.2)                    | 4 (7.1)          | 28 (19.9)         | 14 (11.2)          | 2 (14.3)         | 12 (10.8)        | 22 (11.5)         | 4 (10.0)         | 18 (11.8)         |
| Ankle                           | 28 (14.2)                    | 7 (12.5)         | 21 (14.9)         | 26 (20.8)          | 4 (28.6)         | 22 (19.8)        | 35 (18.2)         | 5 (12.5)         | 30 (19.7)         |
| Foot                            | 19 (9.6)                     | 6 (10.7)         | 13 (9.2)          | 17 (13.6)          | 3 (21.4)         | 14 (12.6)        | 12 (6.3)          | 2 (5.0)          | 10 (6.6)          |
| <b>Unspecified location</b>     | <b>0 (0.0)</b>               | <b>0 (0.0)</b>   | <b>0 (0.0)</b>    | <b>7 (5.6)</b>     | <b>0 (0.0)</b>   | <b>7 (6.3)</b>   | <b>4 (2.1)</b>    | <b>2 (5.0)</b>   | <b>2 (1.3)</b>    |

Injury data is presented with contusions included. Up to three injuries could be reported for each player in a single week.

\*No injuries were reported to the upper arm, elbow, forearm or abdomen.
